# Supplementary material for: The Condition of Four Coral Reefs in Timor-Leste before and after the 2016–2017 Marine Heatwave
Source: MDPI journal article supplement (doi:10.3390/oceans3020012), 2022-04-08
Supplement: s1 [file s1]

## Supplemental Materials for Kim et al. 2022

### 1. Supplemental Tables

**Table S1.** An overview of coral disease prevalence from studies within the Coral Triangle. Few studies included compromised health states in the total ‘health impacts’ prevalence which were included where relevant. Disease and compromised health abbreviations are as follows: AA—algal abrasion; AtrN—Atramentous necrosis; BBD—Black band disease; BL—bleaching; BrB—Brown band disease; Gas—Growth anomalies; N—Necrotic syndrome; PR—Pigmentation Response; PUWS—Porites Ulcerative White Spot; SATL—Subacute tissue loss; SEB—Skeletal eroding band; SLT—silt damage; UWS—Ulcerative white spot; WP—White Plague; WS—White syndrome; YBD—Yellow band disease.

| Location(s)                                      | Diseases                                | Prevalence                                                                    | Reference |
|--------------------------------------------------|-----------------------------------------|-------------------------------------------------------------------------------|-----------|
| Bali, Sulawesi, West Papua, Indonesia            | BBD, BrB, GAs, SEB, WS                  | $0.1 \pm 0.09\%$ – $43.9 \pm 5.1\%$                                           | [166]     |
| Spermonde Archipelago, Indonesia                 | BBD, BrB GAs, SEB, WS                   | $1.6 \pm 0.6\%$ – $5.9 \pm 1.1\%$                                             | [167]     |
| Kepulauan Seribu Marine National Park, Indonesia | BBD, WS                                 | <1% of each disease                                                           | [126]     |
| Panjang Island, Indonesia                        | UWS, WP, YBD                            | UWS: $6.59 \pm 0.08\%$ ; WP: $17.76 \pm 8.6\%$ ; YBD: $2.88 \pm 0.05\%$       | [168]     |
| Spermonde Archipelago, Indonesia                 | AtrN, BrB, GAs SEB, WS                  | <5% each disease                                                              | [127]     |
| Wakatobi National Park, Indonesia                | BBD, GAs, PUWS, WS                      | 2005: 0.15% GAs, 0.42% WS<br>2007: 0.02% BBD, 0.05% GAs, 0.08% PUWS, 0.19% WS | [122,125] |
| Tubbataha Natural Marine Park, Philippines       | BBD, BrB, GAs, SEB, UWS, WS             | $2.4 \pm 0.1\%$ – $13.5 \pm 5.4\%$                                            | [169]     |
| Cebu, Philippines                                | AA, BL, BBD, BrB, GA, PR, SATL, SLT, WS | $12.5 \pm 9.3\%$ – $34.4 \pm 4.1\%$                                           | [170]     |
| Central Philippines                              | BBD, BrB, GAs, SEB, UWS, WS             | 0.25–7.9%                                                                     | [31]      |
| Philippines                                      | Porites GAs, PUWS                       | GAs: 0–39.1%<br>PUWS: 0–43.6%                                                 | [171]     |
| Central Visayas, Lingayen Gulf, Philippines      | GA, N, PR, PUWS, WS                     | $8.3 \pm 1.2\%$                                                               | [172]     |
| Sumilon Island, Philippines                      | PUWS                                    | $0$ – $72.6 \pm 16.5\%$                                                       | [173]     |
| Sabah, Borneo, Malaysia                          | AtrN, BBD, BrB, PR, WS                  | 0–0.44 colonies per m <sup>2</sup>                                            | [174]     |

**Table S2.** Summary of Indo-Pacific studies assessing nutrients on reefs. DIN—dissolved inorganic nitrogen; TN—total nitrogen; TP—total phosphorus.

| Location            | Sampling Description    | Nutrient           | Concentration [ $\mu\text{M}$ ]   | Reference |
|---------------------|-------------------------|--------------------|-----------------------------------|-----------|
| West Hawai'i Island | Reef slope 12 m depth   | $\text{NH}_4^+$    | $0.716 \pm 0.22$                  | [44]      |
|                     |                         | $\text{NO}_3^-$    | $0.38 \pm 0.11$                   |           |
|                     |                         | $\text{PO}_4^{3-}$ | $0.24 \pm 0.07$                   |           |
|                     | Enriched experimentally | $\text{NH}_4^+$    | $148.80 \pm 7.51$                 |           |
|                     |                         | $\text{NO}_3^-$    | $94.35 \pm 19.68$                 |           |
|                     |                         | $\text{PO}_4^{3-}$ | $22.38 \pm 2.06$                  |           |
| Florida Keys        | 5–6 m depth             | DIN                | $1.15 \pm 0.05$                   | [37]      |
|                     | Enriched experimentally | DIN                | $3.91 \pm 1.34$                   |           |
| Kingman Atoll       | 10–12 m depth           | DIN                | $1.3 \pm 0.08$                    | [42]      |
|                     |                         | $\text{PO}_4^{3-}$ | $0.1 \pm 0.003$                   |           |
| Kiribati Atoll      |                         | DIN                | $3.6 \pm 0.1$                     | [42]      |
|                     |                         | $\text{PO}_4^{3-}$ | $0.3 \pm 0.024$                   |           |
| Maui                | Surface 0.25 m depth    | DIN                | $0.1 \pm 0.1$ – $25.6 \pm 17.8$   | [41]      |
|                     |                         | $\text{PO}_4^{3-}$ | $0.06 \pm 0.06$ – $0.43 \pm 0.86$ |           |
|                     | Coastal groundwater     | DIN                | $1.6 \pm 1.8$ – $414.9 \pm 37.8$  |           |
|                     |                         | $\text{PO}_4^{3-}$ | $1.01 \pm 1.03$ – $4.90 \pm 1.06$ |           |
| Philippines         | 1–3 m depth             | TN                 | 5.9–15                            | [171]     |
|                     |                         | TP                 | 0.13–0.98                         |           |
| Majuro Atoll        | Reef flat               | $\text{NH}_4^+$    | $0.34 \pm 0.15$                   | [43]      |
|                     |                         | $\text{NO}_3^-$    | $0.45 \pm 0.45$                   |           |
|                     |                         | $\text{PO}_4^{3-}$ | $0.34 \pm 0.15$                   |           |
|                     | Ground water wells      | $\text{NH}_4^+$    | 2.4–16.9                          |           |
|                     |                         | $\text{NO}_3^-$    | 49–1060                           |           |
|                     |                         | $\text{PO}_4^{3-}$ | 0.2–22.1                          |           |

**Table S3.** Description of coral diseases and compromised health found during surveys in Timor-Leste and references citing negative impacts to corals. Supplemental information to Figures 2 and A1.

| Disease/Condition                                | Description                                                                                                                                                                                                                                                                                                                                                                                                                                                                      |
|--------------------------------------------------|----------------------------------------------------------------------------------------------------------------------------------------------------------------------------------------------------------------------------------------------------------------------------------------------------------------------------------------------------------------------------------------------------------------------------------------------------------------------------------|
| <b>White Syndrome</b>                            | A class of tissue loss disease-producing white symptoms in the Caribbean and the Indo-Pacific. White Syndrome (WS) describes corals with clearly defined lesion of exposed coral skeleton from the rapid sloughing of coral tissue ranging from 1.0 to 124.6 cm of tissue loss per day not associated with predation ( <i>Drupella</i> spp. snails or crown-of-thorns sea stars [COTS]). In the Indo-Pacific, WS predominantly affects tabulate acroporids [26,29,132,175].      |
| <b>Growth Anomalies</b>                          | Gross lesions of raised tissue with lighter pigmentation and enlarged variable polyps affecting several coral genera [176]. Energetically, GAs rely on resources from surrounding healthy tissue [177].                                                                                                                                                                                                                                                                          |
| <b>Trematodiasis</b>                             | Pink, swollen nodules caused by infection of a larval trematode in <i>Porites</i> corals that can reduce colony growth [178,179].                                                                                                                                                                                                                                                                                                                                                |
| <b>Burrowing/Tube-dwelling Invertebrates</b>     | Invertebrates (polychaete worms [180,181], crustaceans [180], bivalves [182], gastropods [91], etc. [182]) that burrow into the surface of corals. Such interactions have been demonstrated to alter coral morphology (furrows) that could impact growth, fecundity, and morality [180]; and reduced skeletal strength in host corals [182].                                                                                                                                     |
| <b>Flatworm Infestation</b>                      | An infestation of flatworms, typically <i>Waminoa</i> spp., on the surface of corals. Infestation has been associated with tissue loss [183], reduced heterotrophic feeding [139], light-shading [137,184], and experimentally shown to feed on coral mucus [138].                                                                                                                                                                                                               |
| <b>Predation</b>                                 | Scars or tissue loss from predation by <i>Drupella</i> spp. snails, COTS, and reef fishes [185]. Typically, invertebrate predators and reef fishes make distinctive lesions.                                                                                                                                                                                                                                                                                                     |
| <b>Tissue Loss</b>                               | Unexplained tissue loss (absence of predator, shape of lesion, etc.) by infectious agents, physiologic disorders, or toxins [176,185].                                                                                                                                                                                                                                                                                                                                           |
| <b>Crustose Coralline Algae (CCA) Overgrowth</b> | CCA in competition with living coral causing a reaction (pigmentation) or overgrowing the coral. Two species of CCA ( <i>Pneophyllum conicum</i> , <i>Lithoamnion</i> spp.) have been identified to overgrow live coral in the Indo-Pacific [186,187].                                                                                                                                                                                                                           |
| <b>Cyanobacteria and Turf Overgrowth</b>         | Cyanobacterial filaments or filamentous turf algae competing with or growing on living coral tissue. Cyanobacteria are often associated with increasing nutrients, smothering of corals [188], and reducing coral recruitment [189]. Decreased coral function such as decreased zooxanthellae density and tissue thickness have been associated with turf–coral interactions [190].                                                                                              |
| <b>Sponge or Tunicate Overgrowth</b>             | Sponge overgrowth on live coral tissue can negatively affect corals [191] with some aggressive species such as <i>Terpios</i> spp. and <i>Cliona</i> spp. killing corals [192]. Colonial tunicates can also smothering live coral [193–195]. Although there are several bioeroding sponges ( <i>Cliona</i> spp.), they are typically easy to visually identify on the surface of the coral colony compared to other burrowing invertebrates and have been classified separately. |
| <b>Pigmentation response</b>                     | Pigmented edge of a coral lesion which may be swollen, form bumps, or irregular shapes. Potentially caused by borers, competitors, breakage, cyanobacteria [196], polychaetes, and/or molluscs [26].                                                                                                                                                                                                                                                                             |

**Table S4.** Site and transect GPS points of coral surveys and seawater sampling at four sites in Timor-Leste. Coral surveys were conducted in Nov 2015 and Jul 2017 while seawater and macroalgae were only collected in 2015 for nutrient analysis.

|         |      | <b>Transect 1</b>                 | <b>Transect 2</b>                 | <b>Transect 3</b>                 |
|---------|------|-----------------------------------|-----------------------------------|-----------------------------------|
| Rural-N | 5 m  | 8°13'26.03" S,<br>125°37'2.03" E  | 8°13'27.56" S,<br>125°36'59.53" E | 8°13'25.22" S,<br>125°37'3.83" E  |
|         | 10 m | 8°13'26.5" S,<br>125°37'2.93" E   | 8°13'28.51" S,<br>125°36'59.52" E | 8°13'25.63" S,<br>125°37'4.25" E  |
| Rural-E | 5 m  | 8°28'30.77" S,<br>125°53'17.01" E | 8°28'28.82" S,<br>125°53'14.82" E | 8°28'29.23" S,<br>125°53'15.67" E |
|         | 10 m | 8°28'31.08" S,<br>125°53'17.36" E | 8°28'30.74" S,<br>125°53'17.41" E | 8°28'29.71" S,<br>125°53'17.46" E |
| Urban-W | 5 m  | 8°33'19.74" S,<br>125°30'0.41" E  | 8°33'18.72" S,<br>125°29'59.46" E | 8°33'18.28" S,<br>125°29'56.95" E |
|         | 10 m | 8°33'18.85" S,<br>125°30'0.57" E  | 8°33'17.04" S,<br>125°29'57.27" E | 8°33'17.88" S,<br>125°30'0.03" E  |
| Urban-E | 5 m  | 8°31'28.68" S,<br>125°36'29.00" E | 8°31'29.82" S,<br>125°36'30.07" E | 8°31'31.87" S,<br>125°36'30.76" E |
|         | 10 m | 8°31'28.26" S,<br>125°36'28.33" E | 8°31'29.80" S,<br>125°36'29.32" E | 8°28'27.94" S,<br>125°53'15.49" E |

**Table S5.** Mean ( $\pm$ SE) percent coral cover, diseased corals, and corals exhibiting signs of compromised health, average number of genera, density of hard corals (colonies/m<sup>2</sup>), total number of colonies surveyed on 15 × 2 m belt transects per site and depth. Abbreviations as follows: % Coral—percent live hard coral cover; % Disease—disease prevalence; % Comp—compromised health prevalence; # Genera—number of genera; Density col/m<sup>2</sup>—density of hard coral colonies per square meter; # Colonies—total number of hard coral colonies. All values are meaned across survey years.

| <b>Site/<br/>Depth</b> | <b>% Coral</b>   | <b>% Disease</b> | <b>% Comp</b>    | <b># Genera</b> | <b>Density<br/>col/m<sup>2</sup></b> | <b># Colonies</b> |
|------------------------|------------------|------------------|------------------|-----------------|--------------------------------------|-------------------|
| Rural-N 5 m            | 47.78 $\pm$ 5.84 | 1.22 $\pm$ 0.19  | 22.22 $\pm$ 1.49 | 30.5 $\pm$ 1.4  | 12.7                                 | 761 $\pm$ 88      |
| 10 m                   | 49.71 $\pm$ 4.38 | 0.79 $\pm$ 0.37  | 21.33 $\pm$ 1.73 | 32.8 $\pm$ 1.7  | 10.8                                 | 647 $\pm$ 61      |
| Rural-E 5 m            | 16.27 $\pm$ 3.13 | 0.09 $\pm$ 0.09  | 49.17 $\pm$ 2.70 | 29.7 $\pm$ 1.0  | 8.6                                  | 516 $\pm$ 50      |
| 10 m                   | 32.37 $\pm$ 4.85 | 0.40 $\pm$ 0.20  | 31.31 $\pm$ 3.51 | 29.0 $\pm$ 1.5  | 7.7                                  | 460 $\pm$ 67      |
| Urban-W 5 m            | 4.66 $\pm$ 1.05  | 0.44 $\pm$ 0.30  | 42.45 $\pm$ 2.70 | 24.7 $\pm$ 1.7  | 5.2                                  | 315 $\pm$ 10      |
| 10 m                   | 32.67 $\pm$ 8.37 | 0.66 $\pm$ 0.32  | 30.52 $\pm$ 5.57 | 18.00 $\pm$ 2.2 | 8.1                                  | 488 $\pm$ 76      |
| Urban-E 5 m            | 22.01 $\pm$ 5.28 | 0.46 $\pm$ 0.23  | 38.50 $\pm$ 1.16 | 26.5 $\pm$ 2.3  | 9.6                                  | 578 $\pm$ 39      |
| 10 m                   | 9.08 $\pm$ 2.14  | 0.42 $\pm$ 0.09  | 34.24 $\pm$ 2.49 | 27.5 $\pm$ 2.2  | 7.9                                  | 472 $\pm$ 5       |

**Table S6.** Average seawater nutrient values from samples collected in triplicate from transects at four sites in Timor-Leste in 2015. DIN is the sum of NH<sub>4</sub><sup>+</sup>, NO<sub>2</sub><sup>-</sup>, and NO<sub>3</sub><sup>-</sup>. All units are in  $\mu$ M.

| <b>Site</b> | <b>Depth</b> | <b>DIN</b>      | <b>NH<sub>4</sub><sup>+</sup></b> | <b>NO<sub>2</sub><sup>-</sup> + NO<sub>3</sub><sup>-</sup></b> | <b>PO<sub>4</sub><sup>+</sup></b> |
|-------------|--------------|-----------------|-----------------------------------|----------------------------------------------------------------|-----------------------------------|
| Rural-E     | 5 m          | 1.87 $\pm$ 0.31 | 0.00 $\pm$ 0.00                   | 0.80 $\pm$ 0.17                                                | 0.00 $\pm$ 0.00                   |
| Rural-E     | 10 m         | 1.9 $\pm$ 0.49  | 1.35 $\pm$ 0.52                   | 0.55 $\pm$ 0.06                                                | 0.09 $\pm$ 0.00                   |
| Rural-N     | 5 m          | 2.19 $\pm$ 0.51 | 1.69 $\pm$ 0.49                   | 0.51 $\pm$ 0.07                                                | 0.10 $\pm$ 0.01                   |
| Rural-N     | 10 m         | 3.39 $\pm$ 0.62 | 2.34 $\pm$ 0.61                   | 1.05 $\pm$ 0.07                                                | 0.15 $\pm$ 0.01                   |
| Urban-E     | 5 m          | 3.4 $\pm$ 0.78  | 2.69 $\pm$ 0.78                   | 0.71 $\pm$ 0.07                                                | 0.11 $\pm$ 0.00                   |
| Urban-E     | 10 m         | 1.78 $\pm$ 0.16 | 1.32 $\pm$ 0.17                   | 0.46 $\pm$ 0.09                                                | 0.10 $\pm$ 0.00                   |
| Urban-W     | 5 m          | 2.31 $\pm$ 0.66 | 1.81 $\pm$ 0.60                   | 0.50 $\pm$ 0.08                                                | 0.10 $\pm$ 0.01                   |
| Urban-W     | 10 m         | 2.79 $\pm$ 0.62 | 2.41 $\pm$ 0.60                   | 0.37 $\pm$ 0.05                                                | 0.09 $\pm$ 0.00                   |

**Table S7.** N% and C:N ratio ANOVA results of two genera of algae sampled in replicates at the four sites (Urban-W, Urban-E, Rural-N, Rural-E), two depths (5 m and 10 m), and three transects per depth in Timor-Leste in 2015. Starred values are significant results with mean, standard error (SE), and post hoc groupings presented per site. No *Chlorodesmis* spp. was sampled at Rural-N or Rural-E at 10 m and the three samples collected from a single transect at Rural-E 5 m were removed for the ANOVAs. df—degrees of freedom.

| <i>Halimeda</i> spp.     |              | df | F-Value | <i>p</i> -Value |        | Rural-E | Rural-N | Urban-E | Urban-W |
|--------------------------|--------------|----|---------|-----------------|--------|---------|---------|---------|---------|
| N%                       | Site         | 3  | 5.779   | 0.0011 *        | mean   | 0.62%   | 0.82%   | 0.48%   | 0.76%   |
| log10                    | Depth        | 1  | 0.2103  | 0.6475          | SE     | 0.06    | 0.08    | 0.02    | 0.07    |
|                          | Site × Depth | 3  | 1.06    | 0.3698          | groups | ab      | b       | a       | b       |
| C:N                      | Site         | 3  | 3.3989  | 0.0207 *        | mean   | 28.24   | 24.77   | 31.56   | 25.02   |
|                          | Depth        | 1  | 0.0687  | 0.7938          | SE     | 1.96    | 1.98    | 1.30    | 1.62    |
|                          | Site × Depth | 3  | 1.2926  | 0.2811          | groups | ab      | b       | a       | b       |
| <i>Chlorodesmis</i> spp. |              |    |         |                 |        |         |         |         |         |
| N%                       | Site         | 1  | 6.0924  | 0.0261 *        | mean   | 2.63%   | -       | 3.31%   | 2.36%   |
|                          | Depth        | 1  | 0.3489  | 0.5635          | SE     | 0.18    |         | 0.18    | 0.29    |
|                          | Site × Depth | 1  | 0.3849  | 0.5443          | groups |         |         | b       | a       |
| C:N                      | Site         | 1  | 4.2869  | 0.0561          | mean   | 11.78   | -       | 9.71    | 10.95   |
|                          | Depth        | 1  | 6.0953  | 0.0261 *        | SE     | 0.87    |         | 0.19    | 0.64    |
|                          | Site × Depth | 1  | 1.6411  | 0.2196          | groups |         |         | a       | b       |

## 2. Additional nutrient data

Nutrients measured in the Lacro river (Manatuto district east of Dili) in 2006 indicated low levels of pollution from sewage and fertilizer [22]. The report concluded that nutrient levels in Lacro were comparable to other tropical rivers [197–199] and tidal seawater samples were similar to unpolluted mangrove sampling in Australia [200]. Ammonium decreased from 4  $\mu\text{M}$  approximately 10 km upstream from the mouth of the Lacro, to  $\sim 2 \mu\text{M}$  at the mouth, and then to  $<1 \mu\text{M}$  about 20 km west of the mouth in Metinaro. Combined nitrate and nitrite dropped from  $>8 \mu\text{M}$  to almost zero from the river mouth to Metinaro. There was a similar pattern with phosphate concentrations of  $0.5 \mu\text{M}$  in the Lacro which dropped to  $0.05 \mu\text{M}$  in Metinaro (Table S9). Located 12 km from the mouth of the Lacro, Rural-E at Manatuto was approximately half-way between the mouth of the Lacro River and Metinaro. Seawater nutrient samples at Rural-N 5 m were in-between values sampled at the Lacro River and Metinaro (Table S9). It is difficult to draw conclusions based on these limited nutrient measurements with 10 years between studies and different sampling locations (riverine and coastal versus 5 m depth on the reef). Additionally, the extent to which riverine outputs affect the downstream coast is not known. However, both surveys were taken during the dry season and though based on the limited evidence, it does not appear that nutrients on the reef at Rural-E are greatly elevated by anthropogenic inputs.

**Table S8.** Nutrients from water samples collected in the Lacro River and Metinaro in 2006 (adapted from [22], permission by Dr. Daniel Alongi) and from Rural-E at 5 m depth in 2015 which is approximately half-way between the mouth of the Lacro and Metinaro in Timor-Leste.

| Site                              | $\text{NH}_4^+ \mu\text{M}$ | $\text{NO}_2^- + \text{NO}_3^- \mu\text{M}$ | $\text{PO}_4^{3-} \mu\text{M}$ |
|-----------------------------------|-----------------------------|---------------------------------------------|--------------------------------|
| Lacro River Upstream              | $4.04 \pm 0.93$             | $8.22 \pm 0.38$                             | $0.49 \pm 0.09$                |
| Lacro River Mouth                 | $1.98 \pm 1.03$             | $8.65 \pm 1.32$                             | $0.54 \pm 0.01$                |
| Rural-E at 5 m (12 km from mouth) | $1.20 \pm 0.28$             | $0.90 \pm 0.16$                             | $0.11 \pm 0.01$                |
| Metinaro (20 km from mouth)       | $0.80 \pm 0.09$             | $0.05 \pm 0.00$                             | $0.05 \pm 0.01$                |

### 3. Supplemental Figures

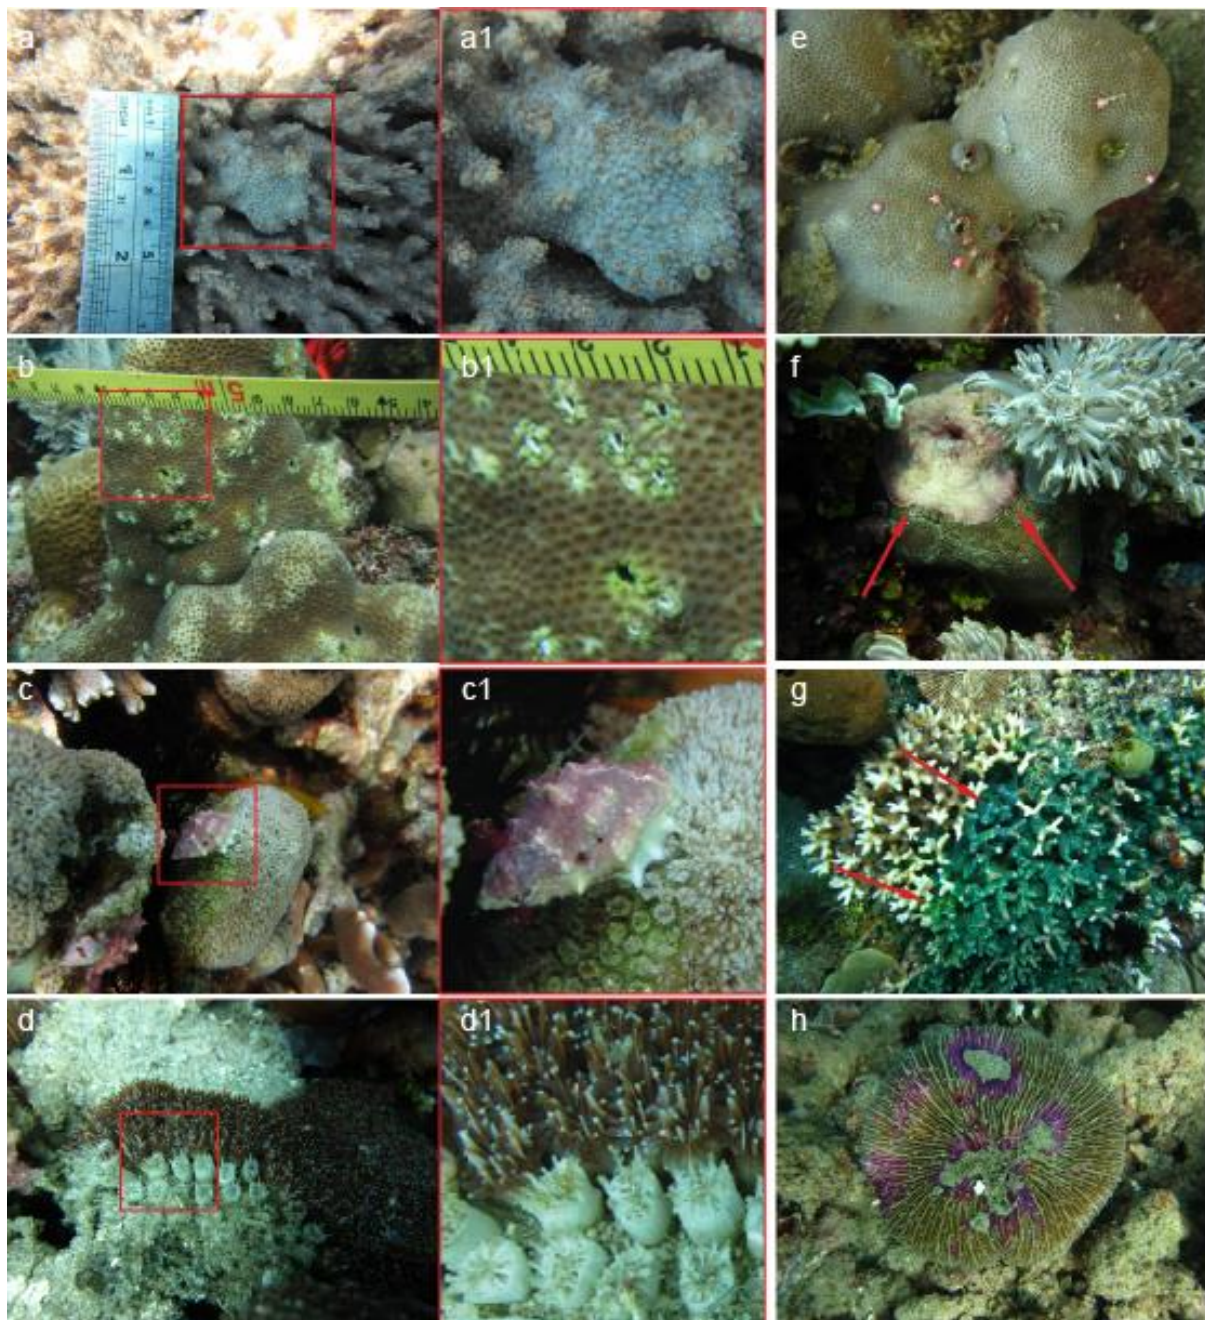

**Figure S1.** Disease and compromised health states found during 15 × 2 m belt transect surveys in Nov 2015 and Jul 2017 at four sites (Rural-N, Rural-E, Urban-W, Urban-E) in Timor-Leste. Red boxes indicate enlarged section of the corresponding picture (a1, b1, c1, and d1): (a) GA—growth anomalies; (b) burrowing invertebrates; (c) *Drupella* spp. snail predation; (d) TL-unexplained tissue loss; (e) potential Trematodiasis; (f) crustose coralline algae overgrowth; (g) tunicate overgrowth; and (h) pigmentation response.

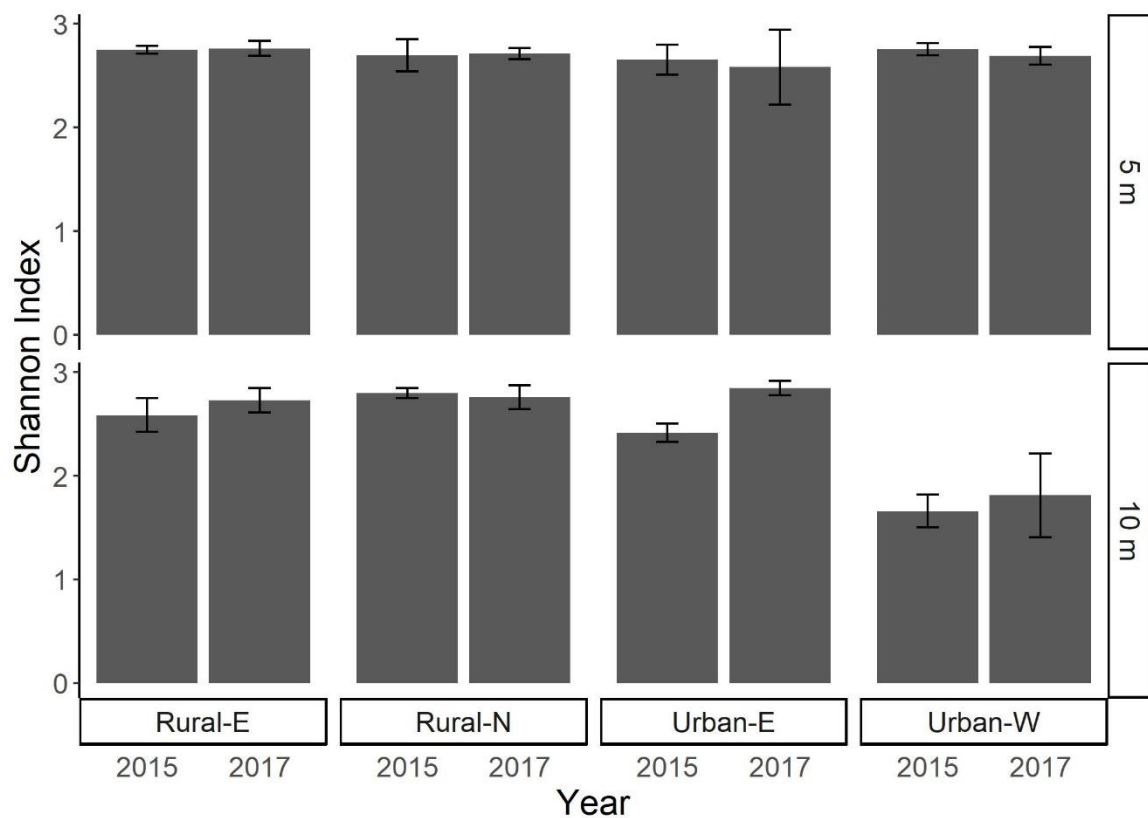

**Figure S2.** Shannon diversity index calculated per site (Rural-N, Rural-E, Urban-W, Urban-E) and depth (5 and 10 m) on genera present per belt transect in Timor-Leste. Sites on the *x*-axis are split into the 2015 and 2017 survey periods. Error bars represent standard error.

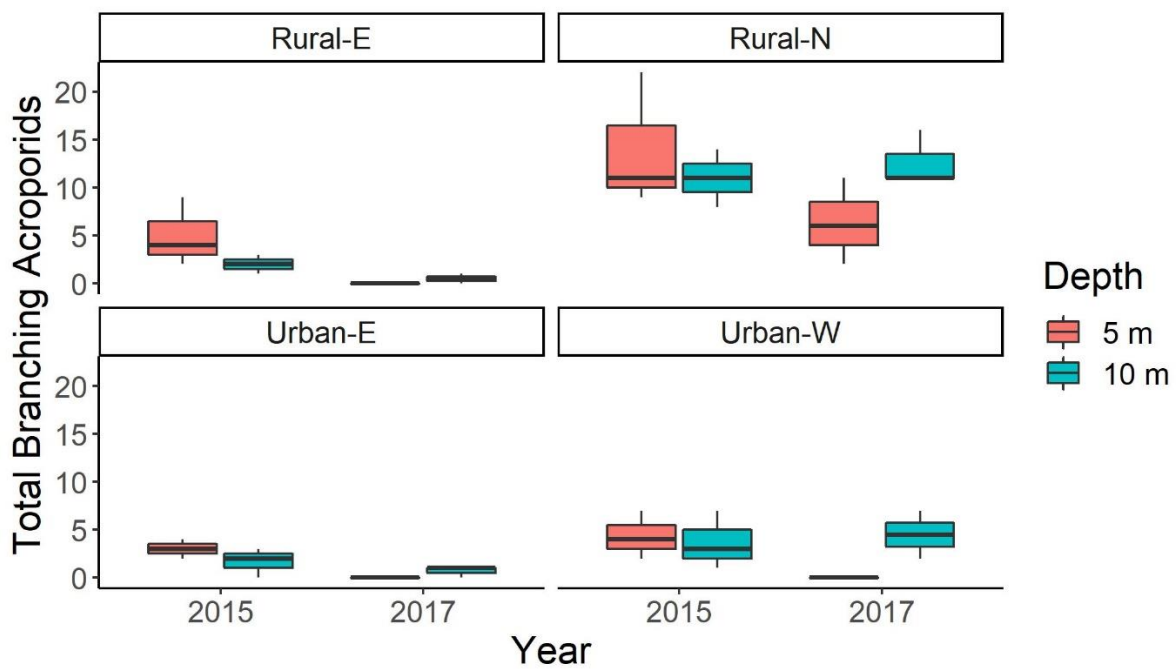

**Figure S3.** Boxplot of the count of branching Acroporids from the coral health 15 × 2 belt transects split by site, depth, and year. The bold black bar represents the median while the upper and lower hinge represents 75% and 25% quantiles, respectively.

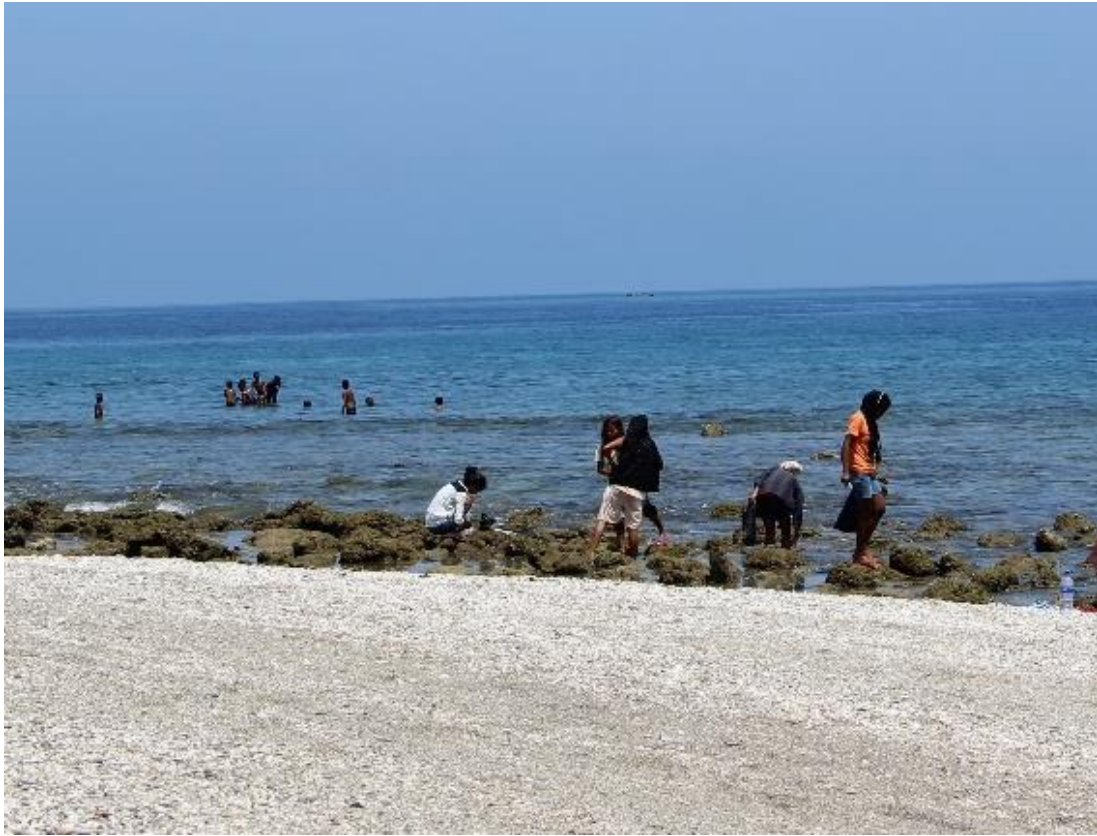

**Figure S4.** Gleaning and recreational activity at Urban-W site in Timor-Leste during the 2015 surveys. Urban-W is in the Dom Alexio subdistrict of Dili which had a population density of 4993.0 people per km<sup>2</sup> in the 2015 Timor-Leste census. Comparatively, the national population density is 79.3 people per km<sup>2</sup>. This beach was within walking distance to densely populated neighborhoods and very popular for swimming, fishing, and gleaning which likely has impacted the shallow-water coral reefs. Women can be seen in the foreground gleaning and children playing on the reef flat further offshore.

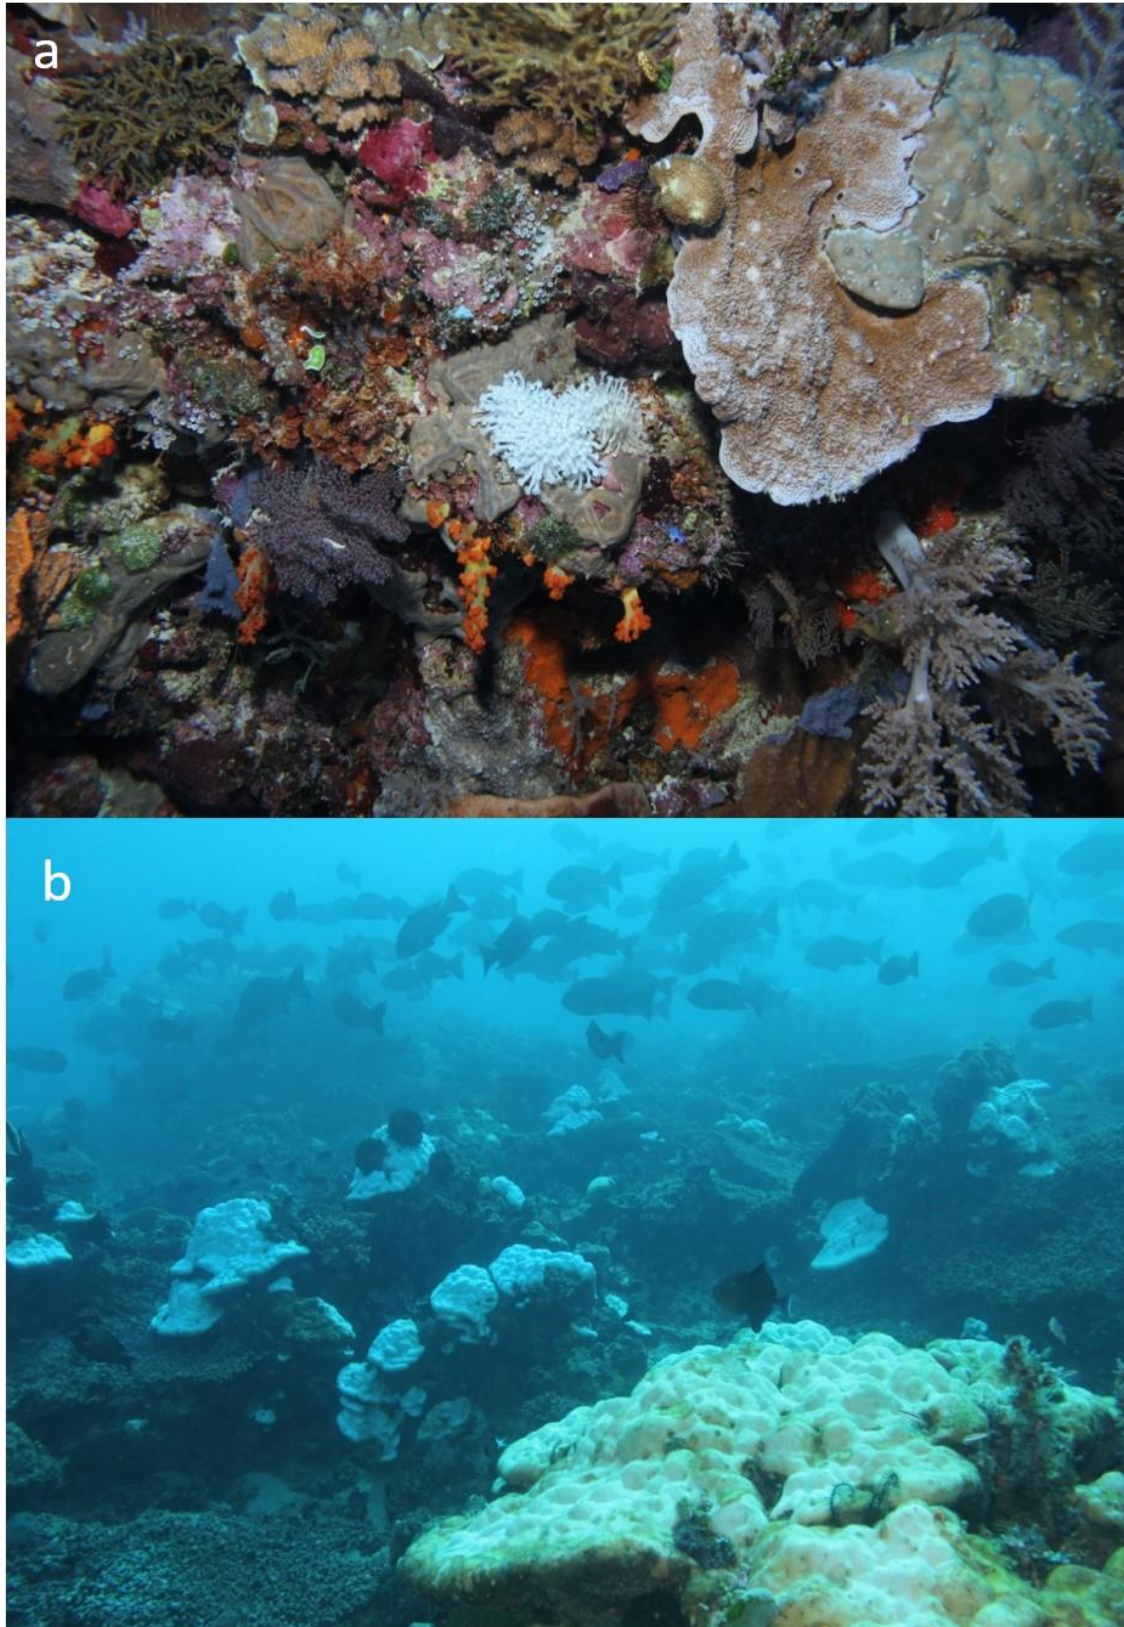

**Figure S5.** Photos by Tony Crean, a local dive operator, emailed on 31 May 2016. **(a)** Bleached *Goniopora* spp. at Adara on the west coast of Ataúro Island. An estimated 90% of *Goniopora* spp. were bleached with no other hard corals affected on Ataúro Island reefs. Depth of the photo unknown. **(b)** Image taken at Jaco Island, the easternmost point of Timor-Leste, showing bleached massive *Porites* spp. corals. The observer indicated that there was a similar percent of corals bleached from 5–18 m.
